# Supplementary material
Source: ML conference proceedings conference paper supplement (https://openreview.net/forum?id=6XATUsHIu0)

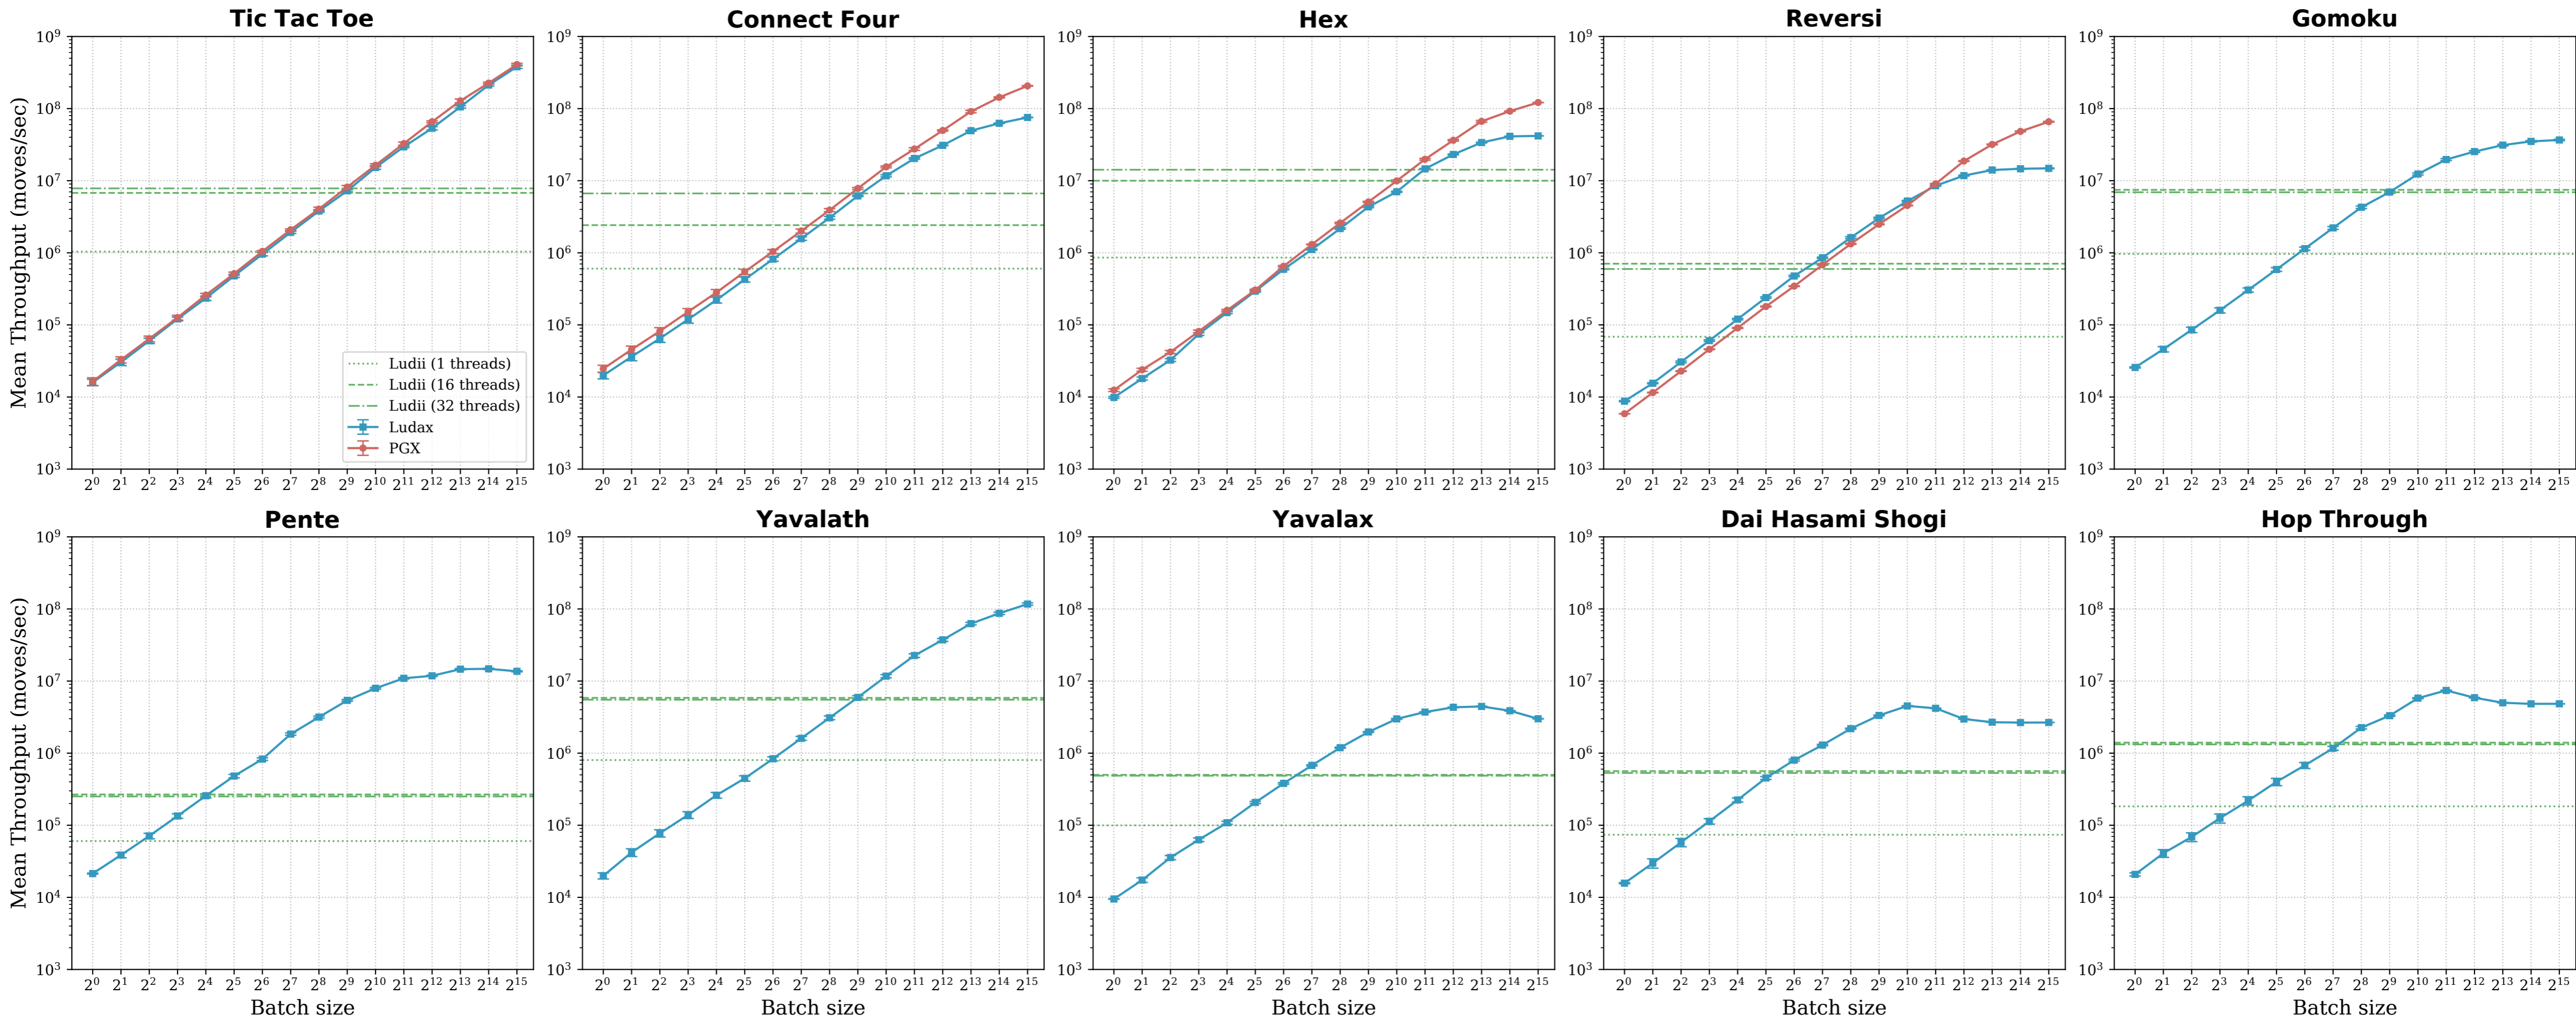

Supplement: supplementary_material [file throughput_comparison.pdf › ludax copy/examples/05-paper-figures/throughput_comparison.pdf]
